# Supplementary material
Source: PubMed Central journal article supplement (PMC4346561)
Supplement: EC.00268-14_zek999094400so1.pdf [file EC.00268-14_zek999094400so1.pdf]

## Supplemental Material

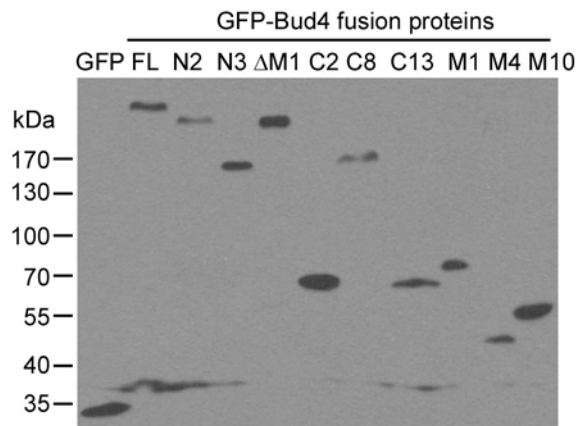

### FIG S1 Expression of Bud4 segments in yeast cells.

Cells of strain YEF473A carrying pBG2 (GFP, vector) or pBG2-BUD4 segments were grown in SC-Ura medium. Cell lysates prepared from the yeast strains were separated by 7.5% SDS-PAGE and immunoblotted with an anti-GFP antibody. Molecular weight of GFP-fusion proteins: Bud4-FL (full-length, a.a. 1-1447, 186.6 kDa), Bud4-N2 (a.a. 1-1066, 144.7 kDa), Bud4-N3 (a.a. 1-622, 95.8 kDa), Bud4- $\Delta$ M1 (a.a. 1-622 plus 881-1447, 158.2 kDa), Bud4-C2 (a.a. 1067-1447, 69.3 kDa), Bud4-C8 (a.a. 623-1447, 118.1 kDa), Bud4-C13 (a.a. 1082-1447, 67.7 kDa), Bud4-M1 (a.a. 623-880, 55.8 kDa), Bud4-M4 (a.a. 623-774, 44.1 kDa), and Bud4-M10 (a.a. 623-804, 47.4 kDa). GFP (238 a.a. plus linker, 29.6 kDa). Note: The GFP-Bud4-M1 segment reproducibly migrated slower than predicted.

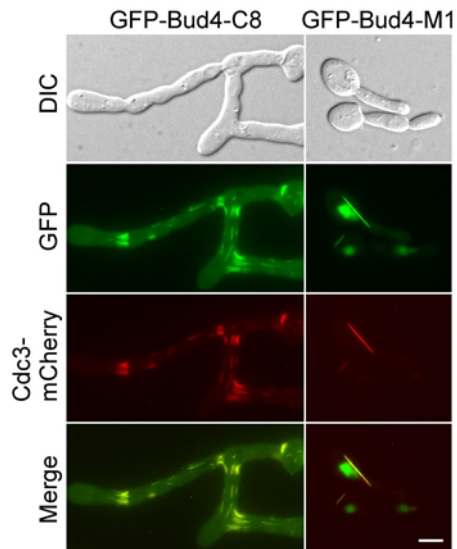

**FIG S2 Co-localization of overexpressed GFP-Bud4-C8 and GFP-Bud4-M1 with the disorganized septins.**

Cells of strain JGY2923 (*bud4* $\Delta$  *CDC3-mCherry:LEU2*) carrying plasmid pGGFP316-BUD4-C8 and pGGFP316-BUD4-M1 were grown on SRG-Ura plate at 30°C for 20 hr. Images were taken by two-color fluorescence microscopy. Bar, 5  $\mu$ m.

**TABLE S1 Yeast strains used in this study**

| Strain          | Genotype                                                                                                                                                                     | Source                                                 |
|-----------------|------------------------------------------------------------------------------------------------------------------------------------------------------------------------------|--------------------------------------------------------|
| JMY314.1-4b     | $\alpha$ <i>leu2-3,112 ura3-1 his3-11,15 trp1-1 ade2-1 can1-100</i><br>(W303 background)                                                                                     | 1                                                      |
| YEF473A         | <i>a his3-<math>\Delta</math>200 leu2-<math>\Delta</math>1 lys2-801 trp1-<math>\Delta</math>63 ura3-52</i>                                                                   | 2                                                      |
| YEF473B         | $\alpha$ <i>his3-<math>\Delta</math>200 leu2-<math>\Delta</math>1 lys2-801 trp1-<math>\Delta</math>63 ura3-52</i>                                                            | 2                                                      |
| YEF1238         | As YEF473A except <i>gin4<math>\Delta</math>::TRP1</i>                                                                                                                       | E. Bi                                                  |
| YEF1342         | As YEF473A except <i>cla4<math>\Delta</math>::HIS3</i>                                                                                                                       | E. Bi                                                  |
| YEF2218         | As YEF473B except <i>cdc12-6</i>                                                                                                                                             | E. Bi                                                  |
| YEF3570         | As YEF473A except <i>bud3<math>\Delta</math>::HIS3</i>                                                                                                                       | J. R. Pringle                                          |
| YEF3572         | As YEF473A except <i>bud4<math>\Delta</math>::HIS3</i>                                                                                                                       | J. R. Pringle                                          |
| YEF4603         | As YEF473B except <i>shs1<math>\Delta</math>::kanMX</i>                                                                                                                      | E. Bi                                                  |
| JGY781          | As YEF473B except <i>bud3<math>\Delta</math>::HIS3 bud4<math>\Delta</math>::HIS3</i>                                                                                         | This study                                             |
| JGY2482         | As JMY314.1-4b except <i>ade3<math>\Delta</math>::kanMX</i>                                                                                                                  | This study                                             |
| JGY2737         | As YEF473B except <i>bud4<math>\Delta</math>::TRP1 shs1<math>\Delta</math>::kanMX</i>                                                                                        | This study                                             |
| JGY2903         | As JGY2482 except <i>iqg1<math>\Delta</math>::His3MX6</i>                                                                                                                    | This study                                             |
| JGY2923         | As YEF473A except <i>bud4<math>\Delta</math>::HIS3 CDC3-mCherry:LEU2</i>                                                                                                     | This study                                             |
| JGY2966         | As YEF473A except <i>bud4<math>\Delta</math>::HIS3 CDC3-mCherry:LEU2</i><br><i>SPC42-mCherry:TRP1</i>                                                                        | This study                                             |
| JGY3035         | As YEF473B except <i>bud3<math>\Delta</math>::HIS3 shs1<math>\Delta</math>::kanMX</i>                                                                                        | Segregants from the cross between YEF3570 and YEF4603. |
| JGY3040         | As YEF473B except <i>bud3<math>\Delta</math>::HIS3 cdc12-6</i>                                                                                                               | Segregants from the cross between YEF3570 and YEF2218. |
| JGY3042         | As YEF473B except <i>bud4<math>\Delta</math>::HIS3 cdc12-6</i>                                                                                                               | Segregants from the cross between YEF3572 and YEF2218. |
| pJ69-4A         | <i>a his3-<math>\Delta</math>200 leu2-3,112 trp1-901 ura3-52 gal4<math>\Delta</math> gal80<math>\Delta</math></i><br><i>LYS2::GAL1-HIS3 GAL2-ADE2 met2::GAL7-lacZ</i>        | 3                                                      |
| pJ69-4 $\alpha$ | $\alpha$ <i>his3-<math>\Delta</math>200 leu2-3,112 trp1-901 ura3-52 gal4<math>\Delta</math> gal80<math>\Delta</math></i><br><i>LYS2::GAL1-HIS3 GAL2-ADE2 met2::GAL7-lacZ</i> | 3                                                      |

## REFERENCE

1. **Ko N, Nishihama R, Tully GH, Ostapenko D, Solomon MJ, Morgan DO, Pringle JR.** 2007. Identification of yeast IQGAP (Iqg1p) as an anaphase-promoting-complex substrate and its role in actomyosin-ring-independent cytokinesis. *Mol. Biol. Cell* **18**:5139-5153.
2. **Bi E, Pringle JR.** 1996. *ZDS1* and *ZDS2*, genes whose products may regulate Cdc42p in *Saccharomyces cerevisiae*. *Mol. Cell. Biol.* **16**:5264-5675.
3. **James P, Halladay J, Craig EA.** 1996. Genomic libraries and a host strain designed for highly efficient two-hybrid selection in yeast. *Genetics* **144**:1425-1436.
